# Supplementary material
Source: Springer Nature journal article supplement (https://www.springermedizin.de/resource/supplementary/13058_2010_2755_MOESM6_ESM.pdf/9702084)

**A**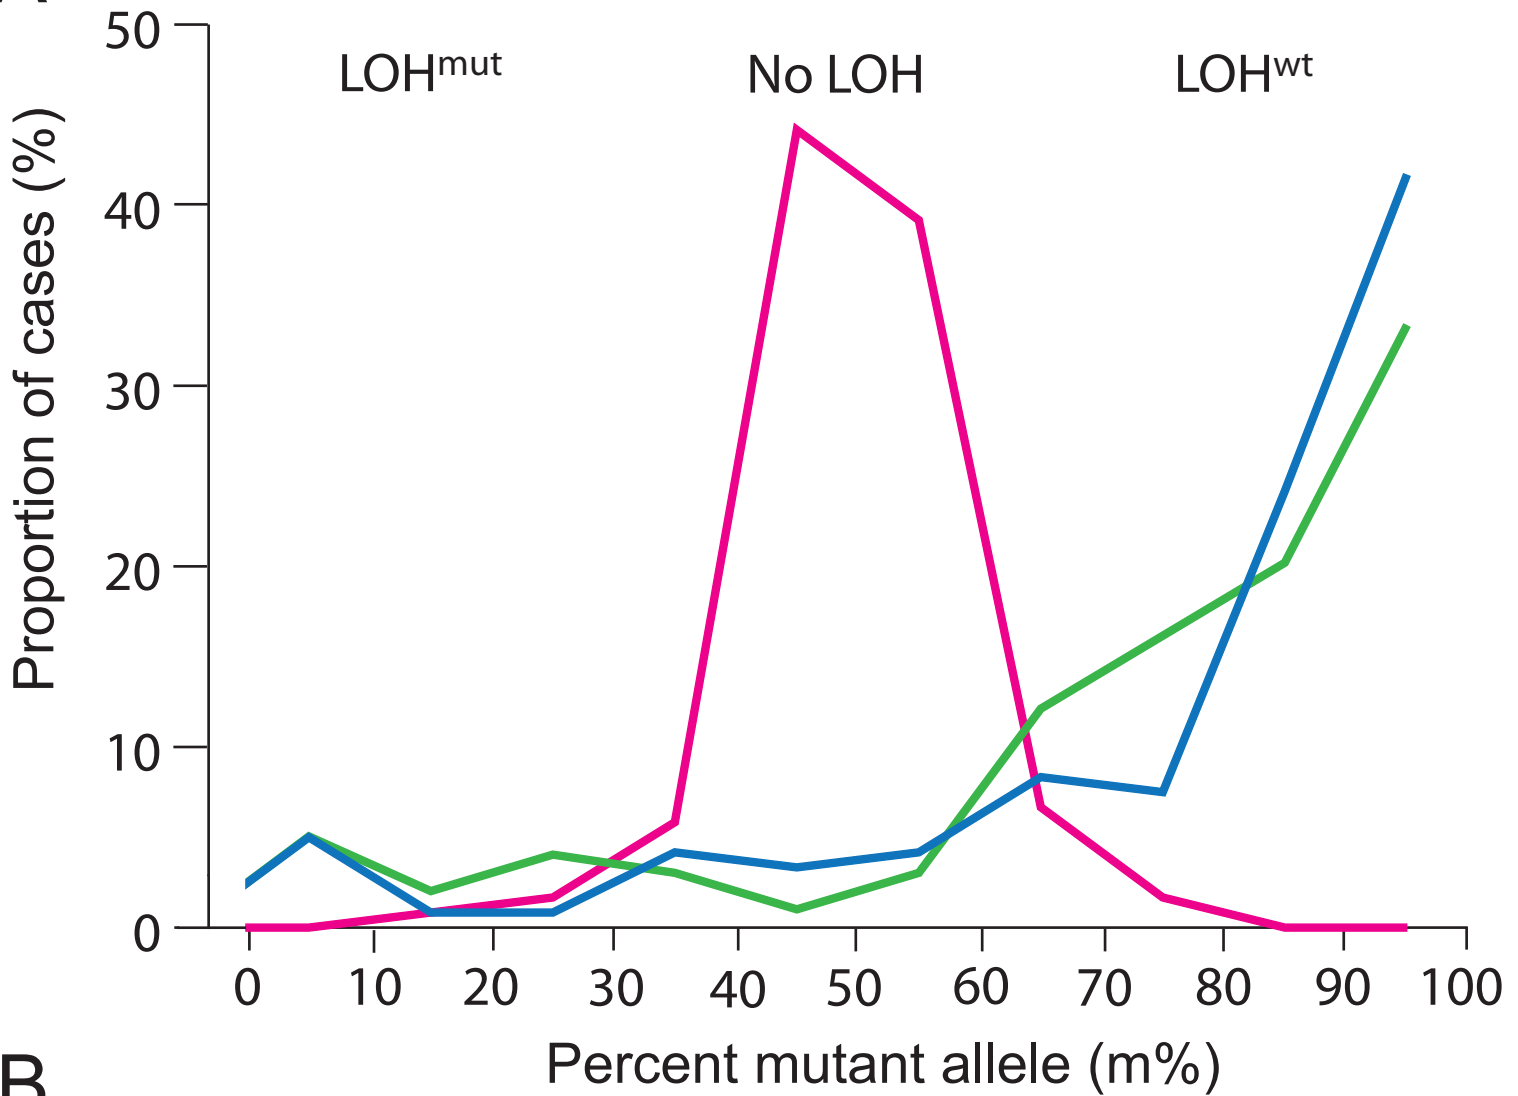**B**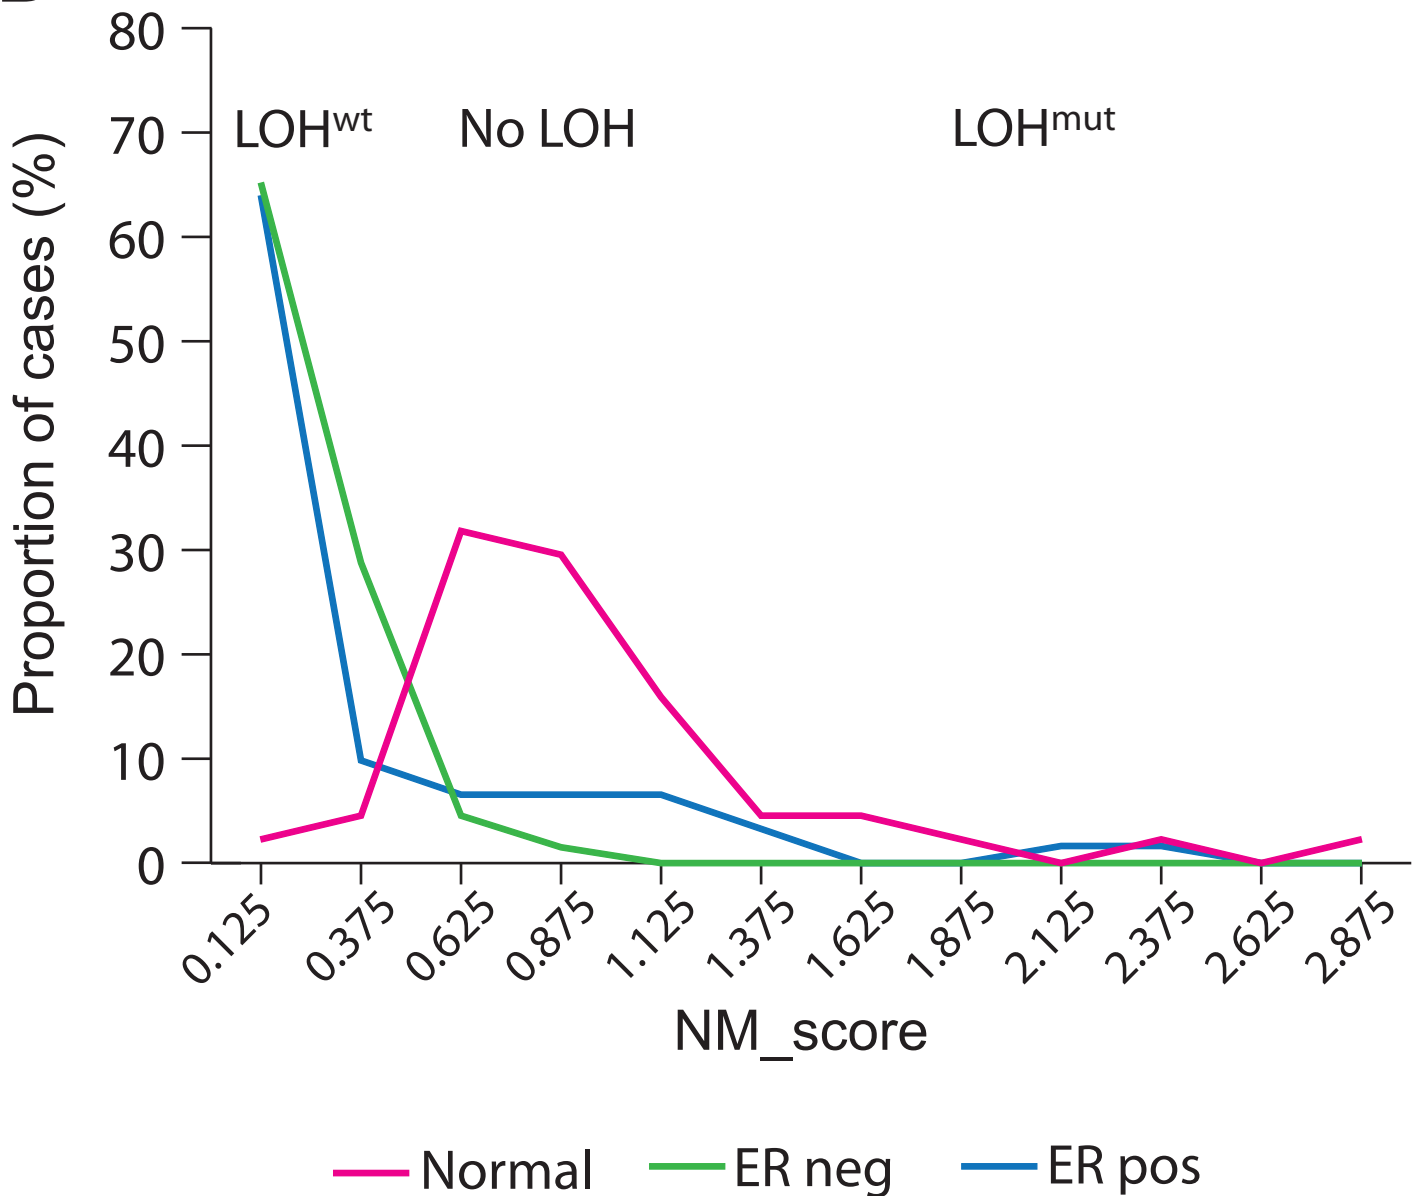

— Normal    — ER neg    — ER pos

Supplement: MOESM6 [file 9702084]
